# Supplementary material
Source: PubMed Central journal article supplement (PMC7091516)
Supplement: mmc1.pdf [file mmc1.pdf]

**Biophysical Journal, Volume 118**

**Supplemental Information**

**Molecular Simulation of Mechanical Properties and Membrane Activities of the ESCRT-III Complexes**

**Tarakanth Mandal, Wilson Lough, Saverio E. Spagnolie, Anjon Audhya, and Qiang Cui**

Table S1: Summary of MD simulations conducted for Vps32 filament models and their interaction with lipid membrane

| System<br>(X × Y × Z nm <sup>3</sup> )                                                                         | Number of<br>proteins and<br>lipids | Total number<br>of atoms | Simulation<br>time (ns) |
|----------------------------------------------------------------------------------------------------------------|-------------------------------------|--------------------------|-------------------------|
| 1-D filament structure<br>(17.7 × 5.3 × 10.8)                                                                  | 6 protein monomers                  | 99,267                   | 100                     |
| 2-D filament structure (two configurations)<br>(17.7 × 5.3 × 10.8)                                             | 12 protein monomers                 | 100,077                  | 100                     |
| 1-D filament mechanical properties<br>(68.7 × 8.4 × 10.6)                                                      | 21 protein monomers                 | 617,044                  | 140                     |
| Protein-membrane interface with HMMM model<br>(four configurations)<br>(14.6 × 14.6 × 14.8)                    | 3 proteins + 360 lipids             | 277,914                  | 75                      |
| Protein-membrane interface with full lipid model <sup>a</sup><br>(four configurations)<br>(15.4 × 15.4 × 11.1) | 3 proteins + 646 lipids             | 270,932                  | 140                     |
| Membrane curvature simulation with full protein<br>(32.2 × 14.4 × 10.9)                                        | 3 proteins + 1172 lipids            | 491,638                  | 85                      |
| Membrane curvature simulation without protein<br>(32.2 × 14.4 × 10.9)                                          | 1172 lipids                         | 484,399                  | 85                      |
| Membrane curvature simulation without $\alpha_0$ helix<br>(32.2 × 14.4 × 10.9)                                 | 3 proteins + 1172 lipids            | 491,131                  | 85                      |
| Membrane curvature simulation with two trimers<br>(61.5 × 14.4 × 11.0)                                         | 6 proteins + 2584 lipids            | 950,196                  | 20                      |
| Membrane curvature simulation with two trimers<br>(108.0 × 14.4 × 12.5)                                        | 6 proteins + 4484 lipids            | 1,872,098                | 20                      |

a. To set up the system, simulations with the HMMM model (the row above) was first conducted at low lipid density or high area/lipid condition to better sample protein insertion and equilibrate lipid distributions around the protein. The full lipid model was then generated by re-growing the tails of the equilibrated HMMM lipids using CHARMM-GUI. The system is then replicating twice along the X and Y directions. Then using VMD, the final full lipid model was generated keeping a single protein trimer and desired number of lipids such that the ratio of POPC:POPS lipids is  $\sim 70:30$  with the same number of POPC/POPS lipids in both leaflets.

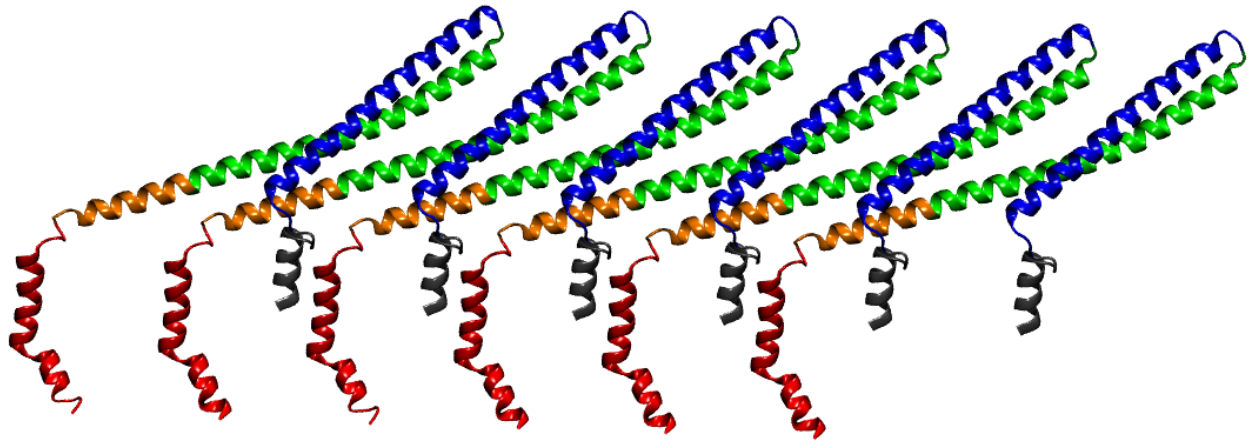

Figure S1: The initial structure of a one-dimensional Vps32 filament, which contains 6 protein monomers.

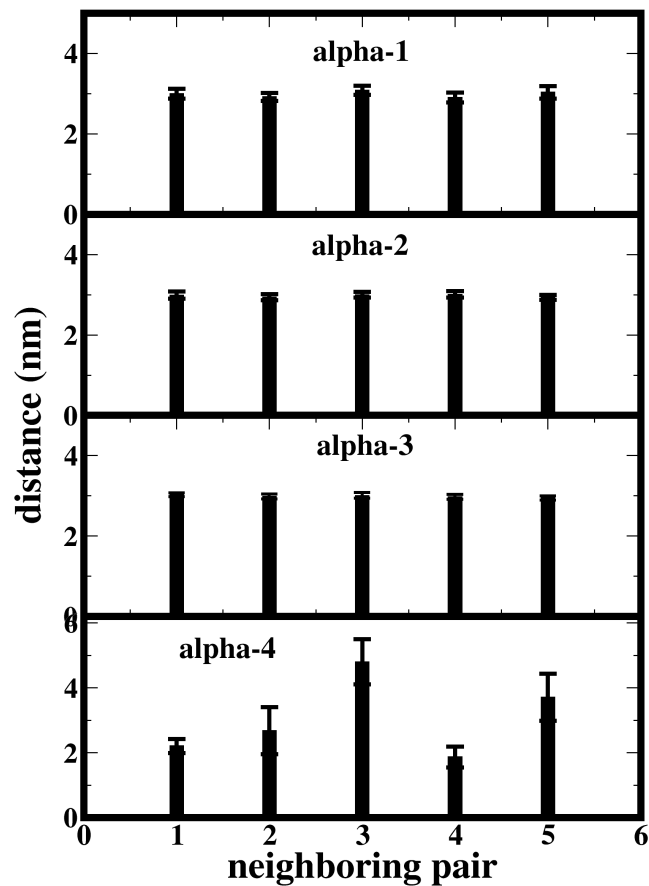

Figure S2: Average distances between the neighboring  $\alpha_1$ ,  $\alpha_2$ ,  $\alpha_3$  and  $\alpha_4$  helices in a one-dimensional Snf7 filament from molecular dynamics simulations. The distance between neighboring  $\alpha_4$  helices may significantly vary.

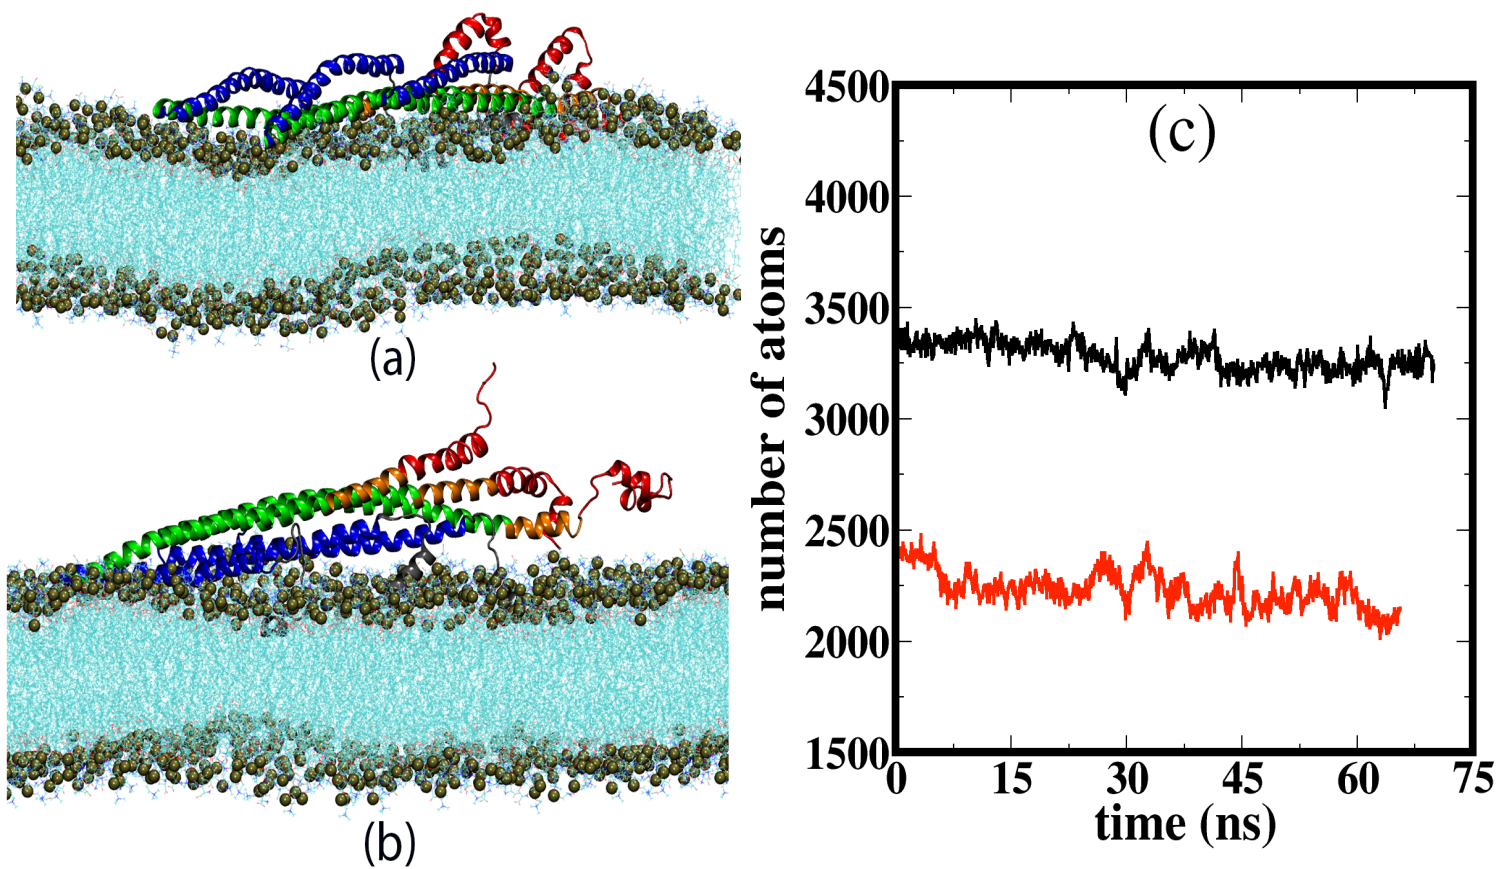

Figure S3: (a) Equilibrated protein-membrane interface structure with (a) the elongated  $\alpha_2$  and  $\alpha_3$  helices facing the membrane surface and (b) with the  $\alpha_1$  helices facing the membrane surface. Gray, blue, green, brown and red color represent the  $\alpha_0$ ,  $\alpha_1$ ,  $\alpha_2$ ,  $\alpha_3$ ,  $\alpha_4$  helices, respectively. Water and ions are removed for clarity. (c) Black and red plots represent the number of protein atoms within 6 Angstrom from the membrane surface when the elongated  $\alpha_2$  and  $\alpha_3$  helices and the  $\alpha_1$  helices are in contact with the membrane, respectively.

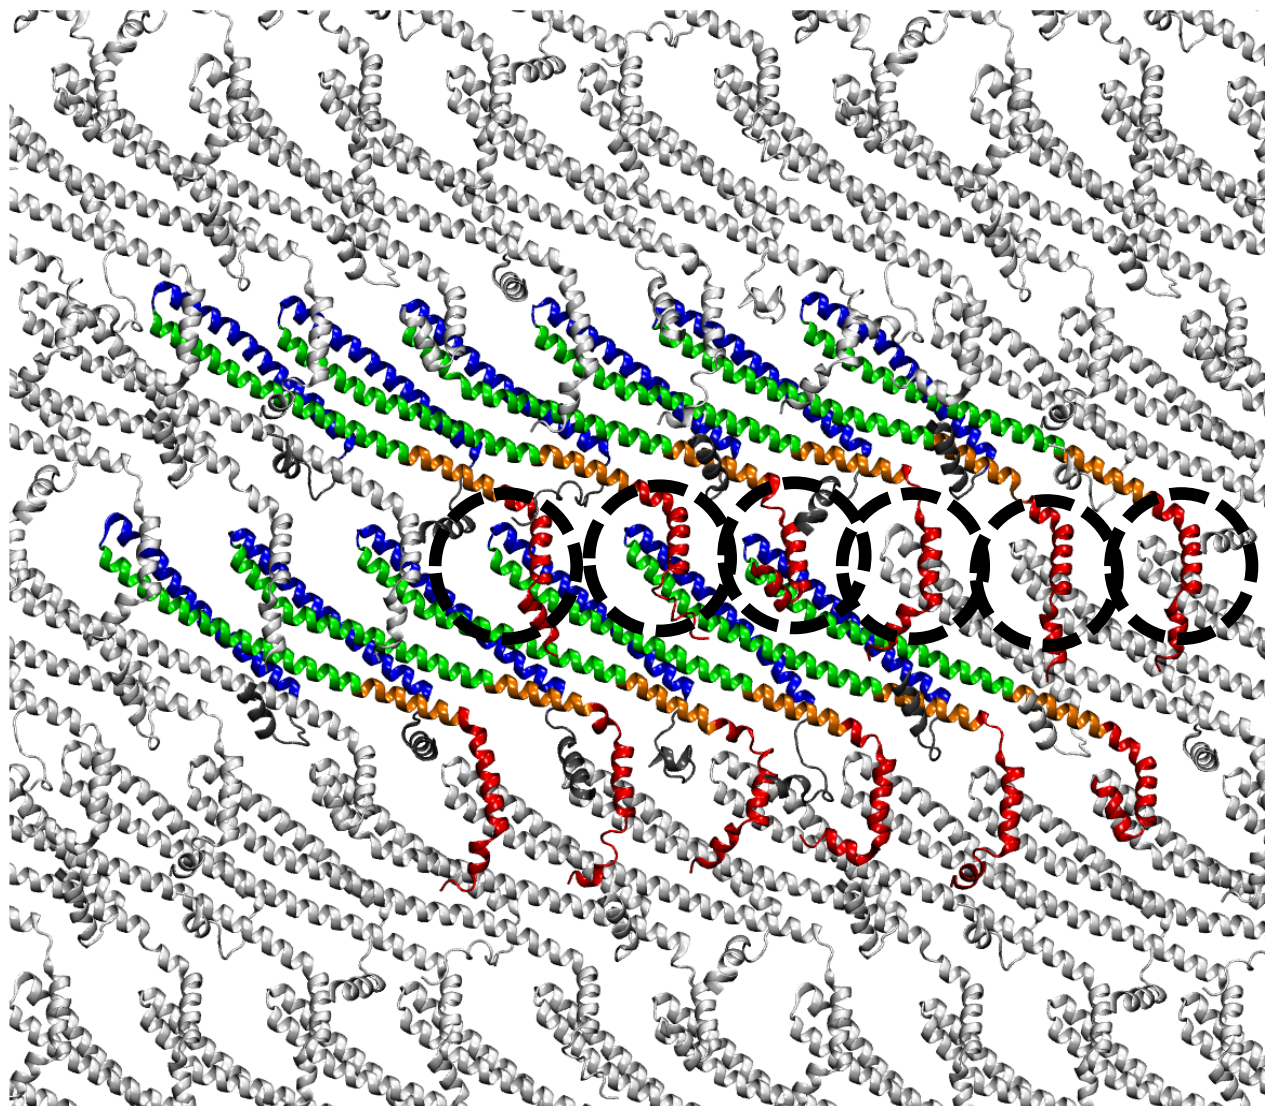

Figure S4: Equilibrated two-dimensional filament structure sampled after 100 ns MD simulations with the initial configuration taken as the same in the crystal structure. Black dotted circles highlight the binding of  $\alpha_4$  helices (red) of a protomer with the  $\alpha_2$  helices (green) of the neighboring protomer.



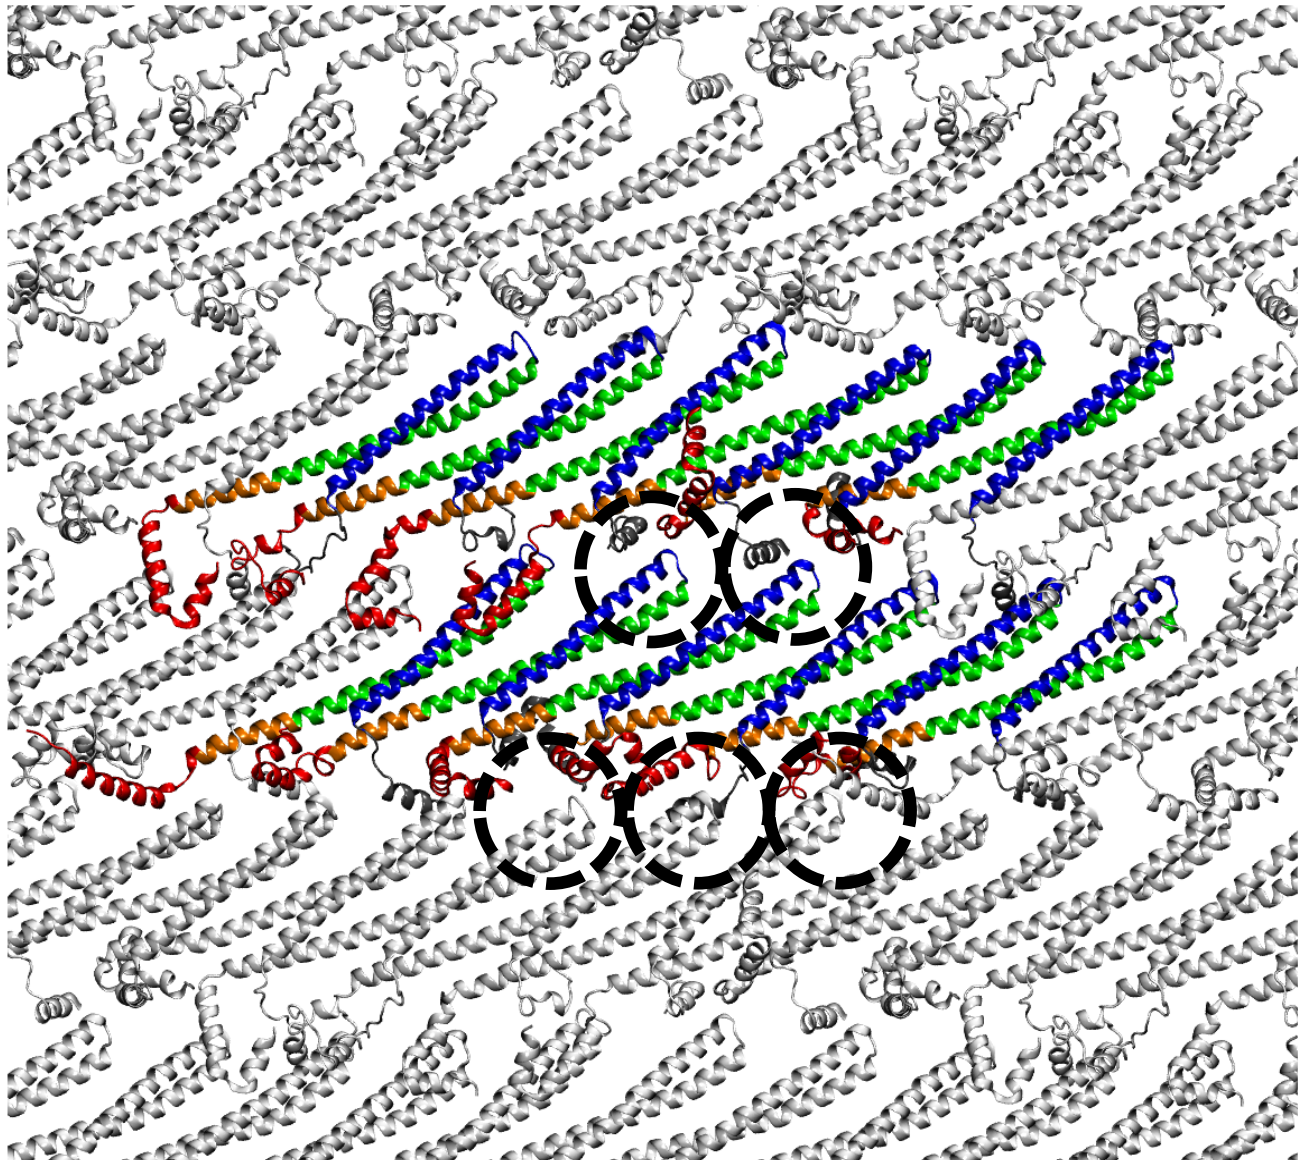

Figure S5: Equilibrated two-dimensional filament structure sampled after 100 ns MD simulations when the initial structure is built such that the  $\alpha_4$  helices of one protofilament are in contact with the  $\alpha_1$  helices of the neighboring protofilament. Black dotted circles highlight that many of the  $\alpha_4$  helices (red) of a protomer do not bind with the  $\alpha_1$  helices (blue) of the neighboring protomer.

To build the initial configuration illustrated in Fig. S5, we first take a unit cell containing a single protein with the crystal structure information (Tang et al. *eLife* 2015; 4:e12548). Then restraining  $\alpha_0$   $\alpha_1$   $\alpha_2$   $\alpha_3$  helices, we rotate the  $\alpha_4$  helix in the unit cell such that it remains close to the  $\alpha_1$  helix of the neighboring protomer when the unit cell is replicated. The two-dimensional structure is then generated by replicating the unit cell.

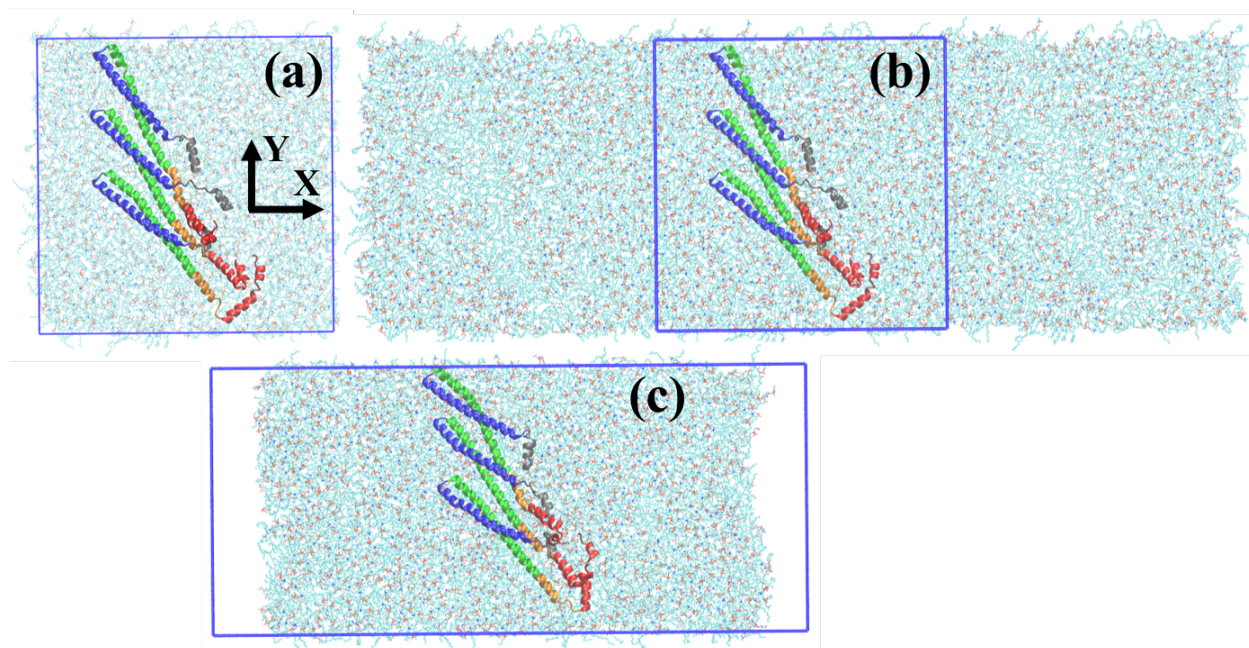

Figure S6: Preparation of the membrane ribbon system. (a) Snapshot of the simulation box containing the protein trimer. (b) The system is replicated twice to generate a longer simulation box along X; the two protein trimers at the ends are removed, leaving only one trimer in the middle. (c) Some lipids from both ends are removed to break the membrane periodicity along the X direction. Water and ions are not shown for clarity.

To generate the membrane ribbon, first we take an equilibrated structure of protein adsorbed on the membrane surface (Fig. S6a), which is then replicated twice keeping the original structure at the center. Two protein trimers at the sides are then removed (Fig. S6b). Finally, some lipid molecules are removed from the two ends such that (i) the ratio of the POPC:POPS lipids is  $\sim 70:30$  and (ii) the numbers of POPC and POPS lipids in both leaflets are the same. The box length along the X direction is taken to be larger than the membrane length to break the membrane periodicity. However, continuity of the membrane along Y is maintained (Fig. S6c). To investigate the role of protein or the  $\alpha_0$  helices in membrane bending (see main text), either the protein trimer or the  $\alpha_0$  helices are removed from the structure shown in Fig. S6c.

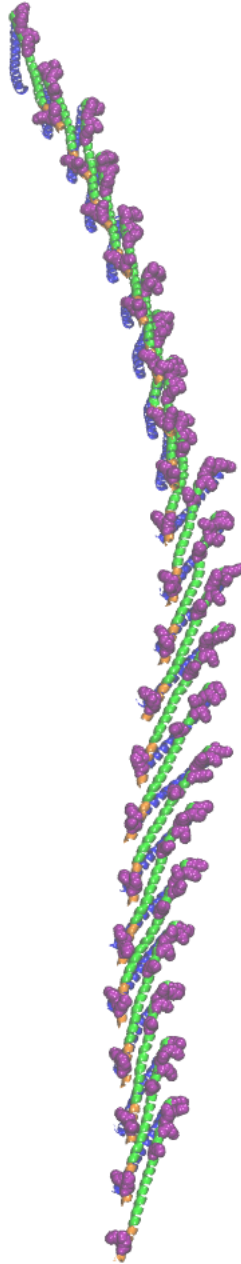

Figure S7: The equilibrated structure showing the intrinsic twist present in the filament. The positively charged Lys60, Lys64, Lys68, Lys71, Lys79, Lys112, and Lys115 residues that form the cationic surface are marked by pink color.



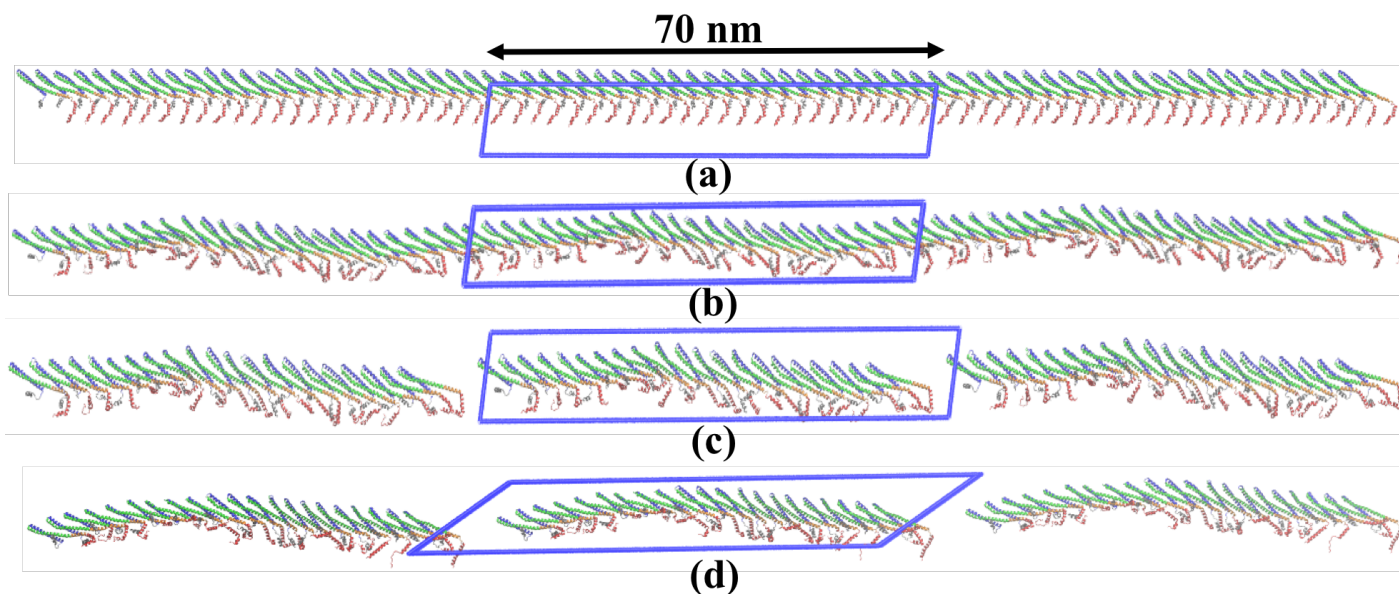

Figure S8: Various steps for simulating a finite filament. (a) First, a one-dimensional periodic filament with 24 monomers is built. (b) The periodic filament is simulated for 60 ns. (c) Three monomers from the equilibrated periodic structure are removed to break the periodicity of the filament. (d) Finally, the non-periodic 21-monomer-long filament is simulated for 80 ns. Water and ions are removed for clarity.

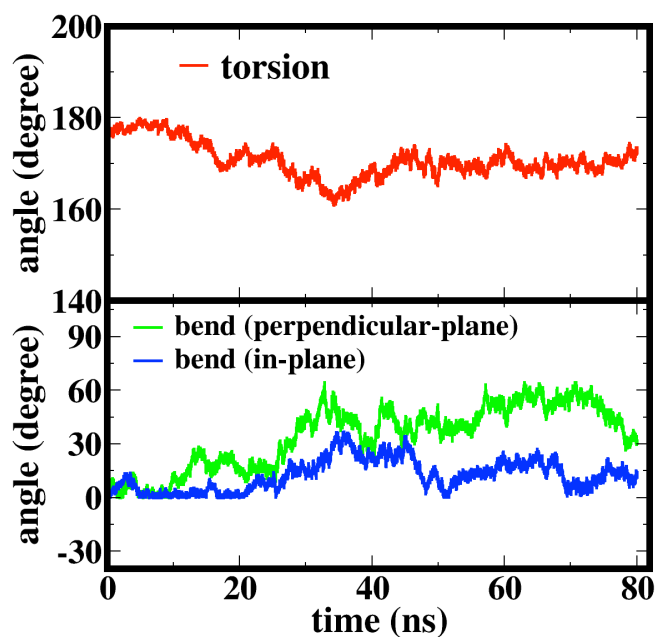

Figure S9: Variation of twist/torsion and bending angles of the 21-monomer-long filament during the MD simulation.

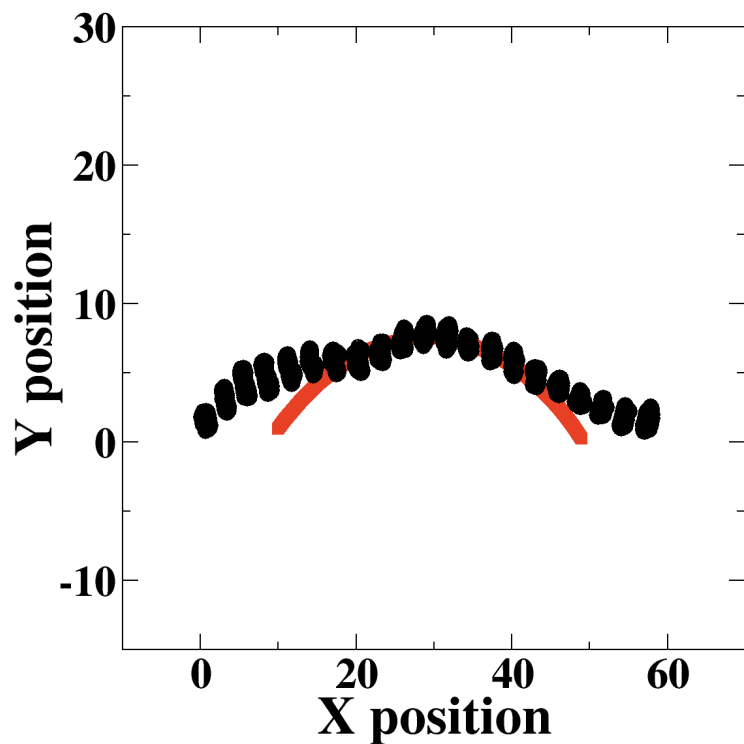

Figure S10: Estimate of radius of curvature of the ESCRT-III filament from MD simulations. The filament structure (e.g., shown in Fig. 4 of the main text) is projected on to the XY plane (the initial filament is oriented along X and lies in the XZ plane), and the traces for centers of mass of the monomers in the central part of the filament are used to estimate the radius of curvature; only the seven monomers in the central part were used to avoid end effects. The average radius of curvature is  $30.5 \pm 9.6$  nm.
